# Supplementary material for: Large-scale bioreactor production of extracellular vesicles from mesenchymal stromal cells for treatment of acute radiation syndrome
Source: PubMed Central journal article supplement (PMC10936083; doi:10.1186/s13287-024-03688-2), 2024-03-13
Supplement: 13287_2024_3688_MOESM1_ESM.pdf [file 13287_2024_3688_MOESM1_ESM.pdf]

Supplemental Figure 1

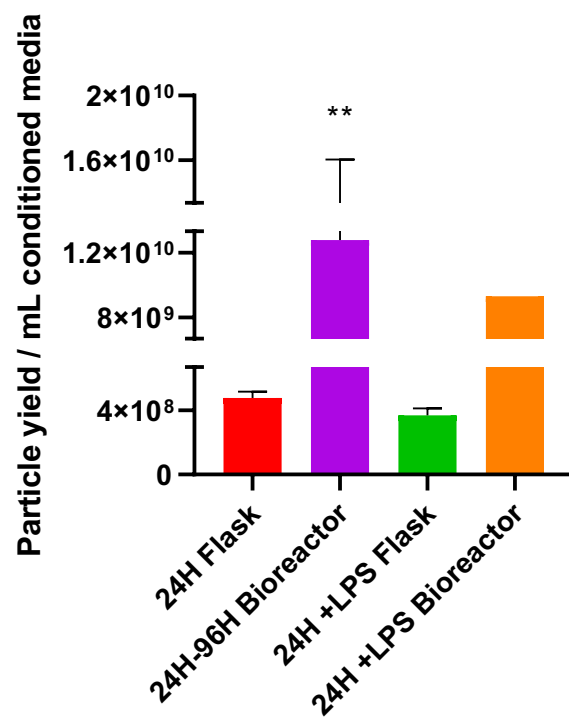

Supplemental Table 1

| <i>Group</i>       | <i>Day post radiation</i> | <i>RBC (M/ul)</i> | <i>WBC (K/ul)</i> | <i>Neutrophils (K/ul)</i> | <i>Lymphocytes (K/ul)</i> | <i>Monocytes (K/ul)</i> | <i>Platelets (K/ul)</i> | <i>Platelet volume (fL)</i> |
|--------------------|---------------------------|-------------------|-------------------|---------------------------|---------------------------|-------------------------|-------------------------|-----------------------------|
| Pre-rad Control    | n/a                       | 8.86 (0.18)       | 2.75 (0.33)       | 1.56 (0.13)               | 0.93 (0.19)               | 0.13 (0.02)             | 955.4 (48.1)            | 4.90 (0.03)                 |
| PBS                | 5-6                       | 7.44 (0.57)*      | 0.36 (0.08)**     | 0.09 (0.03)***            | 0.17 (0.06)*              | 0.02 (0.01)*            | 164.6 (32.6)***         | 5.61 (0.33)**               |
| Flask-EVs          | 5-6                       | 8.67 (1.0)        | 0.27 (0.03)*      | 0.04 (0.01)**             | 0.14 (0.04)               | 0.02 (0.01)             | 175.0 (31.5)***         | 5.50 (0.53)*                |
| Bioreactor-EVs     | 5-6                       | 9.67 (0.81)       | 0.25 (0.04)*      | 0.04 (0.02)**             | 0.07 (0.06)               | 0.01 (0.003)            | 175.3 (34.9)***         | 5.73 (0.54)**               |
| Flask LPS - EVs    | 5-6                       | 8.82 (0.58)       | 0.25 (0.05)***    | 0.05 (0.01)***            | 0.09 (0.02)*              | 0.02** (0.002)          | 134.2 (14.6)***         | 6.65 (0.13)***              |
| Bioreactor LPS-EVs | 5-6                       | 9.72 (1.0)        | 0.26 (0.05)*      | 0.05 (0.02)**             | 0.11 (0.05)               | 0.03 (0.02)             | 180.0 (33.0)***         | 6.50 (0.17)**               |
| Flask-EVs          | 30-31                     | 7.47 (0.06)       | 2.3 (0.13)        | 0.84 (0.07)               | 1.26 (0.04)               | 0.2 (0.04)              | 876.7 (113.0)           | 5.75 (0.07)***              |
| Flask LPS - EVs    | 30-31                     | 7.78 (0.29)       | 1.87 (0.42)       | 1.47 (0.42)               | 0.30 (0.06)               | 0.07 (0.02)             | 487.6 (80.2)***         | 5.76 (0.15)***              |
| Bioreactor LPS-EVs | 30-31                     | 8.64 (0.47)       | 1.59 (0.11)       | 1.36 (0.08)               | 0.19 (0.04)               | 0.17 (0.003)            | 438.7 (115.4)*          | 5.77 (0.32)***              |
